# Supplementary material for: Long‐Term Prognostic Risk in Lower Extremity Peripheral Arterial Disease as a Function of the Number of Peripheral Arterial Lesions
Source: PubMed Central journal article supplement — J Am Heart Assoc. 2015 Oct 26;4(10):e001823. doi: 10.1161/JAHA.115.001823 (PMC4845133; doi:10.1161/jaha.115.001823), 2015-10-26
Supplement: JAH3-4-e001823-s001.pdf [file JAH3-4-e001823-s001.pdf]

## SUPPLEMENTAL MATERIAL

**FIGURE S1 – Flow Chart of the Study Population**

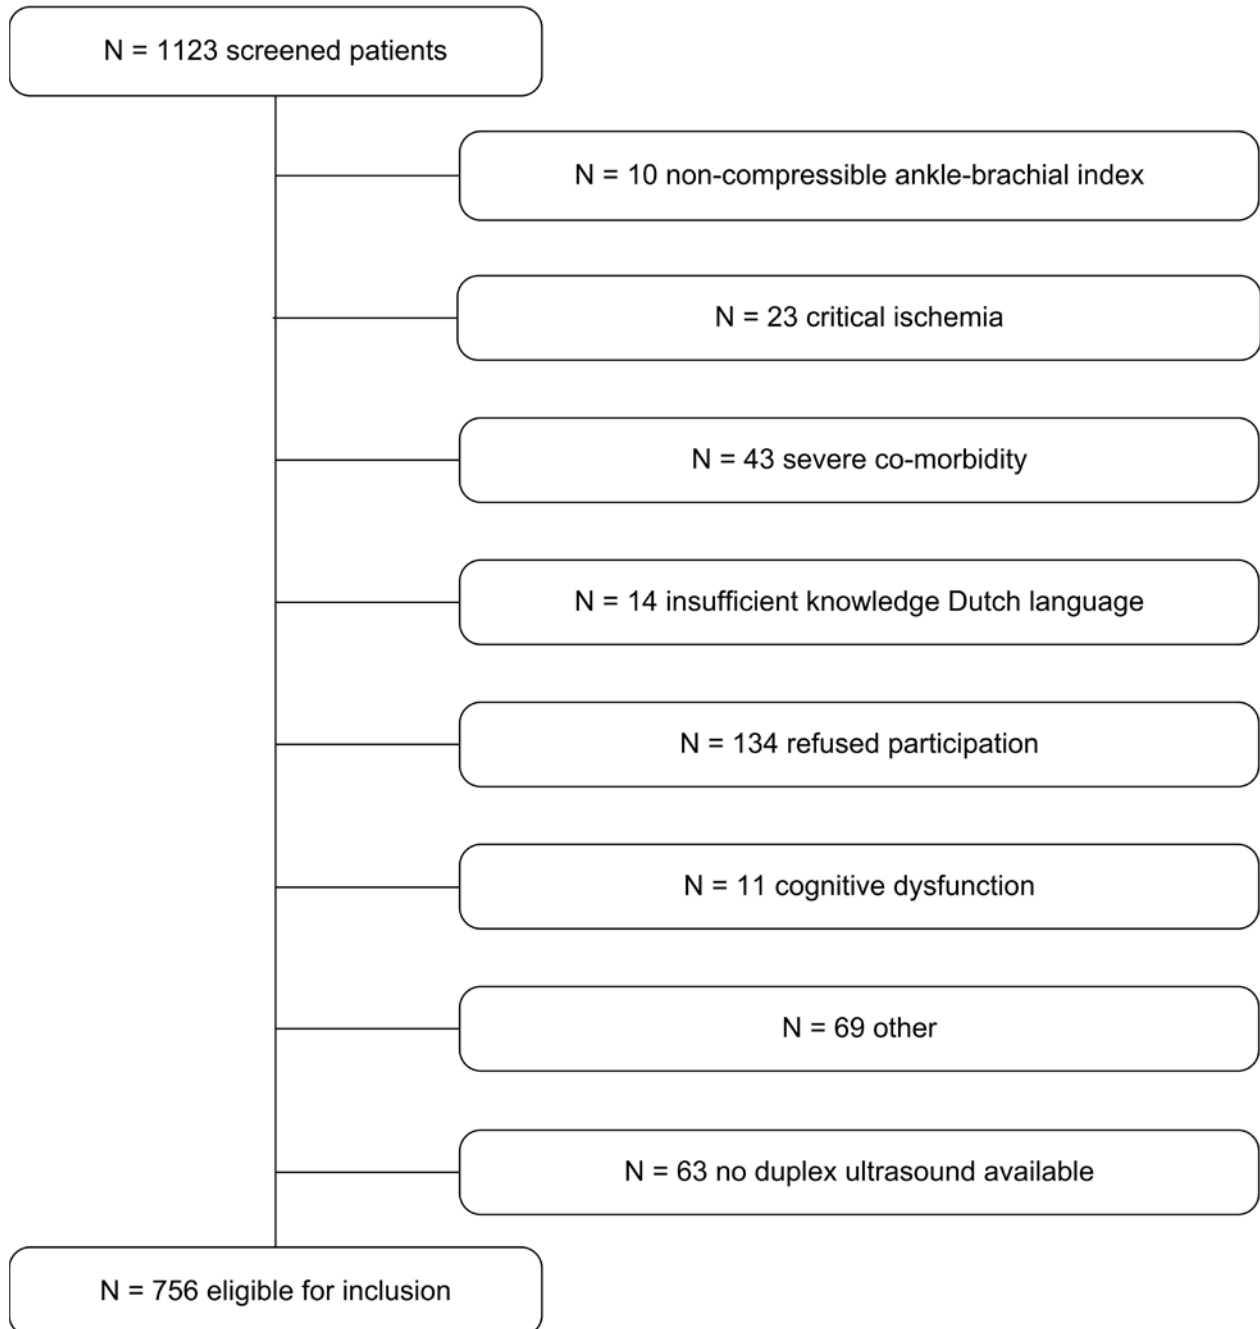

**FIGURE S2 – The Mean Cumulative Incidence for Experiencing Multiple Adverse Events by the Number of Lesions during a Median Follow-Up of 3.2-Years.** The estimated cumulative incidence curves for 0-1 and 2 lesions were virtually identical, and therefore they are labeled as one curve 0-2 lesions. The p-value for the comparison of 0-2 lesions vs. 3+ lesions was  $P=0.001$ .

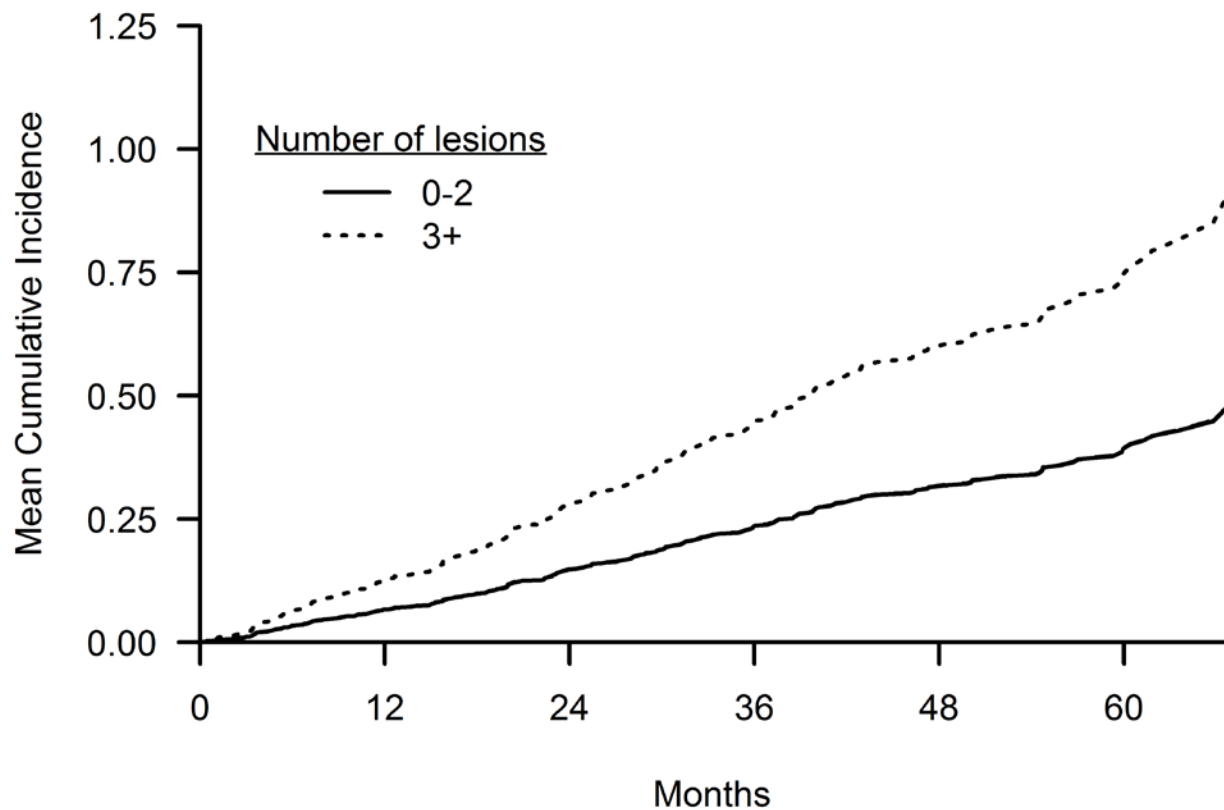

**TABLE S1 - The Association between the Number of Lesions and 3.2-Year Multiple Adverse Events Risk.**

|                                             | <b>Hazard<br/>Ratio</b> | <b>95%<br/>Confidence<br/>Interval</b> | <b>P-value</b>  |
|---------------------------------------------|-------------------------|----------------------------------------|-----------------|
| <hr/>                                       |                         |                                        |                 |
| Number of lesions                           |                         |                                        |                 |
| 2 vs. 1                                     | 0.92                    | 0.64-1.34                              | .67             |
| 3+ vs. 1                                    | <b>1.53</b>             | <b>1.08-2.18</b>                       | <b>.018</b>     |
| Resting ankle-brachial index (per +10%)     | 0.92                    | 0.84-1.01                              | .07             |
| Age (per +10 years)                         | <b>1.30</b>             | <b>1.10-1.54</b>                       | <b>.003</b>     |
| Female                                      | 1.04                    | 0.77-1.39                              | .82             |
| Body mass index (per +5 kg/m <sup>2</sup> ) | 1.08                    | 0.93-1.26                              | .32             |
| Prior angina                                | 1.15                    | 0.79-1.68                              | .46             |
| Prior myocardial infarction                 | <b>1.47</b>             | <b>1.04-2.09</b>                       | <b>.031</b>     |
| Heart failure                               | <b>1.76</b>             | <b>1.05-2.95</b>                       | <b>.033</b>     |
| Prior coronary artery bypass graft          | 1.11                    | 0.74-1.67                              | .60             |
| Prior percutaneous coronary intervention    | 1.32                    | 0.86-2.03                              | .20             |
| Prior stroke                                | 1.25                    | 0.74-2.09                              | .40             |
| Prior transient ischemic attack             | 0.58                    | 0.34-1.00                              | .05             |
| Chronic obstructive pulmonary disease       | <b>1.80</b>             | <b>1.30-2.51</b>                       | <b>&lt;.001</b> |
| Hypertension                                | 1.07                    | 0.78-1.49                              | .67             |
| Dyslipidemia                                | 1.24                    | 0.89-1.72                              | .20             |
| Diabetes mellitus                           | 1.14                    | 0.83-1.58                              | .42             |

---

|                                                      | <b>Hazard</b> | <b>95%</b>        | <b>P-value</b> |
|------------------------------------------------------|---------------|-------------------|----------------|
|                                                      | <b>Ratio</b>  | <b>Confidence</b> |                |
|                                                      |               | <b>Interval</b>   |                |
| <i>Table S1 (continued)</i>                          |               |                   |                |
| Renal dysfunction                                    | 1.09          | 0.70-1.67         | .71            |
| Smoking                                              | <b>1.45</b>   | <b>1.06-1.98</b>  | <b>.020</b>    |
| Total cholesterol (per +50 mg/dL)                    | 0.88          | 0.73-1.07         | .19            |
| High-density lipoprotein cholesterol (per +10 mg/dL) | 1.08          | 0.97-1.21         | .16            |
| Systolic blood pressure (per +10 mmHg)               | 1.01          | 0.95-1.08         | .72            |
| Proximal lesion                                      | 0.79          | 0.58-1.10         | .16            |

Abbreviations: kg=kilogram, m<sup>2</sup>=square meters, mg/dL=milligrams per deciliter, mmHg=millimeters of mercury.
